# Supplementary material for: Exploring the nature of the clopidogrel–bromocresol green interactionviaspectrophotometric measurements and quantum chemical calculations
Source: Royal Society of Chemistry journal article supplement (doi:10.1039/c8ra05187a), 2018-01-01
Supplement: c8ra05187a1.pdf [file c8ra05187a1.pdf]

## Supplementary Information

### **Exploring the Nature of Clopidogrel-Bromocresol Green-Interaction via Spectrophotometric Measurements and Quantum Chemical Calculations**

Sabrein H. Mohamed<sup>a,\*</sup>, Alyaa I. Magdy<sup>b</sup>, Ashour A. Ahmed<sup>c</sup>

<sup>a</sup> Chemistry Department, Faculty of Science, Cairo University, Giza, Egypt.

<sup>b</sup> Chemistry Department, Faculty of Engineering, Madina High Institute for Engineering and Technology, Giza, Egypt.

<sup>c</sup>Institute of Physics, University of Rostock, D-18059 Rostock, Germany.

Email: [sabrein@sci.cu.edu.eg](mailto:sabrein@sci.cu.edu.eg), [sabrein\\_harbi@yahoo.com](mailto:sabrein_harbi@yahoo.com)

## Figures

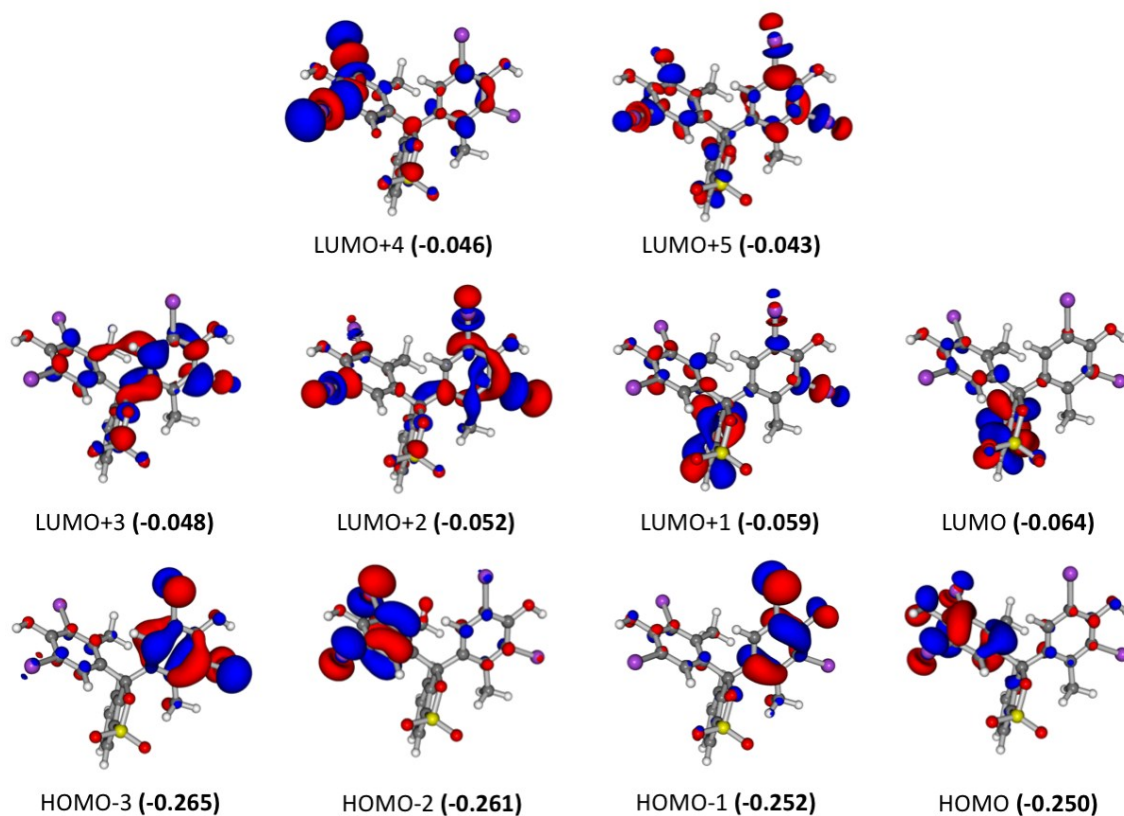

**Fig. S1.** Frontier molecular orbitals for the optimized geometry of BCG at the B3LYP/6-31+G(d,p)+Lan12dz level of theory and using CPCM. Values in parentheses are the electronic energies in a.u. of the corresponding frontier molecular orbitals. Band gap = 0.186 a.u.

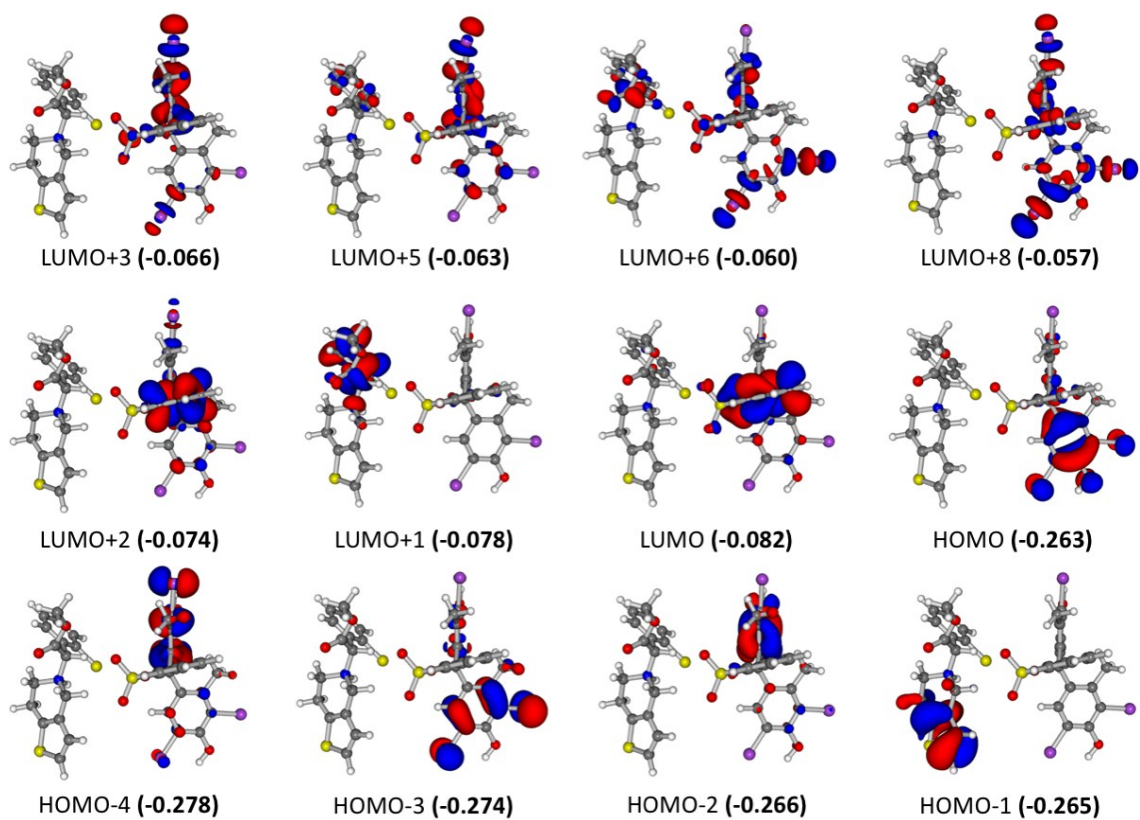

**Fig. S2.** Frontier molecular orbitals for the optimized geometry of BCG–CLOP<sup>+</sup> ion-pair at the B3LYP/6–31+G(d,p)+Lan12dz level of theory and using CPCM. Values in parentheses are the electronic energies in a.u. of the corresponding frontier molecular orbitals. Band gap = 0.181 a.u.

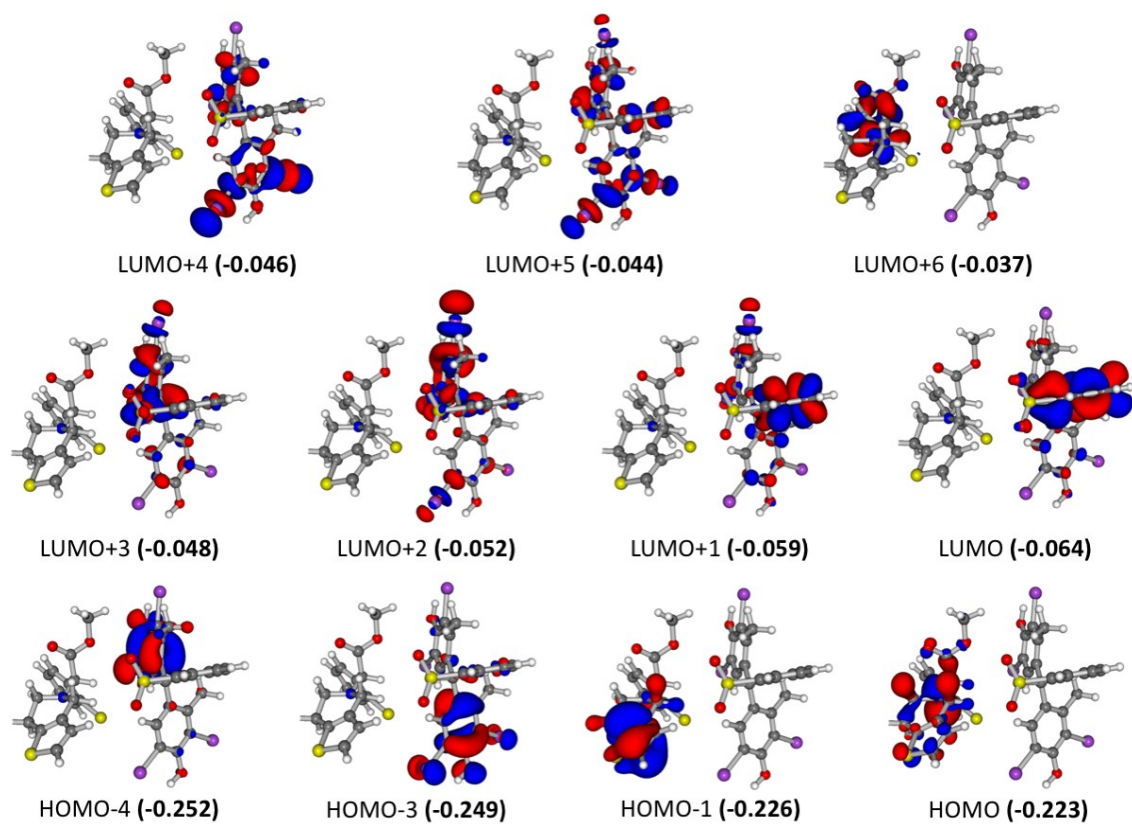

**Fig. S3.** Frontier molecular orbitals for the optimized geometry of BCG–CLOP ion-pair at the B3LYP/6–31+G(d,p)+Lan12dz level of theory and using CPCM. Values in parentheses are the electronic energies in a.u. of the corresponding frontier molecular orbitals. Band gap = 0.159 a.u.

## Tables

**TableS1.** Possible excited states, their oscillator strength values, and most contributed electronic transitions to every excited state calculated for BCGat the B3LYP6-31+G(d,p)+Lanl2dz level of theory and using CPCM.

| Excitation                      | Oscillator strength | Transitions     | Contributions [%] |
|---------------------------------|---------------------|-----------------|-------------------|
| excited state 1<br>(282.65 nm)  | 0.0098              | HOMO-1 → LUMO   | 18.6              |
|                                 |                     | HOMO-1 → LUMO+1 | 25.0              |
|                                 |                     | HOMO-1 → LUMO+2 | 23.2              |
|                                 |                     | HOMO → LUMO     | 13.7              |
| excited state 2<br>(280.35 nm)  | 0.0304              | HOMO → LUMO     | 40.3              |
|                                 |                     | HOMO → LUMO+2   | 19.0              |
|                                 |                     | HOMO → LUMO+4   | 20.4              |
| excited state 3<br>(274.68 nm)  | 0.0060              | HOMO → LUMO     | 30.5              |
|                                 |                     | HOMO → LUMO+1   | 30.2              |
|                                 |                     | HOMO → LUMO+2   | 8.7               |
|                                 |                     | HOMO → LUMO+4   | 10.6              |
| excited state 4<br>(268.78 nm)  | 0.0033              | HOMO-1 → LUMO   | 64.3              |
| excited state 5<br>(266.71 nm)  | 0.0038              | HOMO-3 → LUMO   | 11.7              |
|                                 |                     | HOMO-3 → LUMO+1 | 12.9              |
|                                 |                     | HOMO-3 → LUMO+2 | 25.6              |
|                                 |                     | HOMO-1 → LUMO+1 | 16.0              |
| excited state 6<br>(266.10 nm)  | 0.0314              | HOMO-2 → LUMO   | 21.5              |
|                                 |                     | HOMO → LUMO     | 11.0              |
|                                 |                     | HOMO → LUMO+1   | 14.3              |
|                                 |                     | HOMO → LUMO+3   | 10.0              |
|                                 |                     | HOMO → LUMO+4   | 17.1              |
| excited state 7<br>(263.27 nm)  | 0.0083              | HOMO-2 → LUMO   | 10.1              |
|                                 |                     | HOMO-1 → LUMO+3 | 10.1              |
|                                 |                     | HOMO → LUMO+1   | 31.0              |
| excited state 8<br>(260.60 nm)  | 0.0477              | HOMO-3 → LUMO+1 | 12.9              |
|                                 |                     | HOMO-3 → LUMO+3 | 9.2               |
|                                 |                     | HOMO-1 → LUMO+1 | 10.21             |
|                                 |                     | HOMO-1 → LUMO+3 | 4.7               |
| excited state 9<br>(258.19 nm)  | 0.0091              | HOMO-1 → LUMO+1 | 31.2              |
|                                 |                     | HOMO-1 → LUMO+2 | 27.1              |
|                                 |                     | HOMO-1 → LUMO+5 | 13.7              |
| excited state 10<br>(257.29 nm) | 0.0214              | HOMO-2 → LUMO+4 | 26.1              |
|                                 |                     | HOMO → LUMO+3   | 27.0              |
| excited state 11<br>(255.46 nm) | 0.0065              | HOMO-2 → LUMO   | 8.5               |
|                                 |                     | HOMO → LUMO+2   | 35.6              |
|                                 |                     | HOMO → LUMO+3   | 18.2              |
|                                 |                     | HOMO → LUMO+4   | 21.1              |
| excited state 12<br>(253.27 nm) | 0.0295              | HOMO-2 → LUMO   | 47.5              |
|                                 |                     | HOMO-2 → LUMO+1 | 29.2              |

**TableS2.** Possible excited states, their oscillator strength values, and most contributed electronic transitions to every excited state calculated for BCG–CLOP<sup>+</sup>ion-pair at the B3LYP/6–31+G(d,p)+Lanl2dz level of theory and using CPCM.

| Excitation                      | Oscillator strength | Transitions                                                          | Contributions [%]           |
|---------------------------------|---------------------|----------------------------------------------------------------------|-----------------------------|
| excited state 1<br>(287.27 nm)  | 0.0471              | HOMO → LUMO                                                          | 89.7                        |
| excited state 2<br>(282.74 nm)  | 0.0045              | HOMO-2 → LUMO<br>HOMO-2 → LUMO+2                                     | 52.9<br>16.5                |
| excited state 3<br>(277.77 nm)  | 0.0102              | HOMO → LUMO+2<br>HOMO → LUMO+3<br>HOMO → LUMO+6<br>HOMO → LUMO+8     | 49.1<br>9.5<br>10.4<br>13.3 |
| excited state 4<br>(274.78 nm)  | 0.0024              | HOMO-2 → LUMO<br>HOMO-2 → LUMO+2<br>HOMO-2 → LUMO+5                  | 43.3<br>20.4<br>8.3         |
| excited state 5<br>(270.99 nm)  | 0.0093              | HOMO-3 → LUMO<br>HOMO → LUMO+3<br>HOMO → LUMO+5<br>HOMO → LUMO+6     | 32.2<br>8.3<br>8.9<br>8.5   |
| excited state 6<br>(270.53 nm)  | 0.0011              | HOMO-1 → LUMO<br>HOMO-1 → LUMO+1                                     | 38.4<br>60.9                |
| excited state 7<br>(267.69 nm)  | 0.0005              | HOMO-1 → LUMO<br>HOMO-1 → LUMO+1                                     | 61.0<br>37.9                |
| excited state 8<br>(267.22 nm)  | 0.0231              | HOMO-4 → LUMO+3<br>HOMO-3 → LUMO<br>HOMO-2 → LUMO+2<br>HOMO → LUMO+2 | 11.4<br>20.4<br>8.4<br>15.9 |
| excited state 9<br>(265.78 nm)  | 0.0051              | HOMO-4 → LUMO+3<br>HOMO-2 → LUMO+5<br>HOMO → LUMO+2                  | 12.6<br>20.1<br>14.5        |
| excited state 10<br>(264.16 nm) | 0.0001              | HOMO-2 → LUMO+1<br>HOMO → LUMO+1                                     | 32.5<br>64.8                |
| excited state 11<br>(262.30 nm) | 0.0302              | HOMO-4 → LUMO<br>HOMO-4 → LUMO+2<br>HOMO-2 → LUMO+5                  | 19.0<br>15.6<br>11.8        |
| excited state 12<br>(261.38 nm) | 0.0002              | HOMO-2 → LUMO+1<br>HOMO → LUMO+1                                     | 64.2<br>31.5                |

**TableS3.** Possible excited states, their oscillator strength values, and most contributed electronic transitions to every excited state calculated for BCG–CLOP ion-pair at the B3LYP/6–31+G(d,p)+Lanl2dz level of theory and using CPCM.

| Excitation                      | Oscillator strength | Transitions                                                          | Contributions [%]            |
|---------------------------------|---------------------|----------------------------------------------------------------------|------------------------------|
| excited state 1<br>(313.76 nm)  | 0.0000              | HOMO → LUMO                                                          | 98.7                         |
| excited state 2<br>(305.62 nm)  | 0.0001              | HOMO-1 → LUMO                                                        | 98.6                         |
| excited state 3<br>(302.57 nm)  | 0.0001              | HOMO → LUMO+1                                                        | 98.3                         |
| excited state 4<br>(294.50 nm)  | 0.0006              | HOMO → LUMO+2<br>HOMO → LUMO+6                                       | 18.8<br>59.8                 |
| excited state 5<br>(294.42 nm)  | 0.0000              | HOMO-1 → LUMO+1                                                      | 90.6                         |
| excited state 6<br>(291.63 nm)  | 0.0002              | HOMO → LUMO+2                                                        | 70.6                         |
| excited state 7<br>(285.17 nm)  | 0.0003              | HOMO → LUMO+3                                                        | 85.4                         |
| excited state 8<br>(283.46 nm)  | 0.0069              | HOMO-4 → LUMO<br>HOMO-4 → LUMO+1<br>HOMO-4 → LUMO+2<br>HOMO-3 → LUMO | 22.3<br>27.8<br>21.9<br>11.4 |
| excited state 9<br>(282.19 nm)  | 0.0004              | HOMO-1 → LUMO+2                                                      | 89.1                         |
| excited state 10<br>(280.84 nm) | 0.0346              | HOMO-3 → LUMO<br>HOMO-3 → LUMO+2<br>HOMO-3 → LUMO+4                  | 51.4<br>10.6<br>12.1         |
| excited state 11<br>(280.49 nm) | 0.0034              | HOMO → LUMO+4                                                        | 81.0                         |
| excited state 12<br>(275.88 nm) | 0.0006              | HOMO-1 → LUMO+3<br>HOMO → LUMO+5                                     | 54.2<br>36.4                 |
